# Supplementary material
Source: HighWire-hosted journal article supplement (https://jitc.bmj.com/content/7/1/48)
Supplement: media-1 [file media-1.pdf]

## Additional File 1

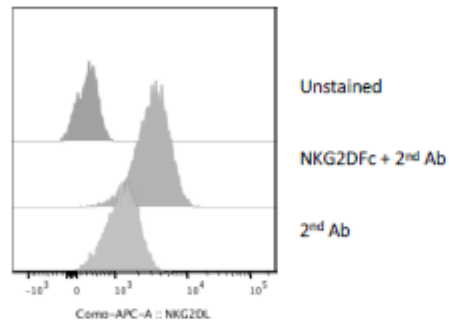

**Additional File 1: Target cells used for the in vivo CTL assay express NKG2D ligands.** Spleens were harvested from euthanized mice and prepared for use in the in vivo CTL assay. Briefly, spleens were subjected to ammonium chloride-based osmotic shock for red blood cell lysis, peptide loading, CFSE labelling, and adoptive transfer into a host mouse. Twelve hours after transfer, spleens were recovered from host mice. Expression of NKG2D ligands was confirmed by flow cytometry using NKG2D-Fc chimera in CFSE + cells. Unstained and secondary antibody alone are shown.
