# Supplementary material
Source: HighWire-hosted journal article supplement (https://jitc.bmj.com/content/7/1/48)
Supplement: media-3 [file media-3.pdf]

### Additional File 3

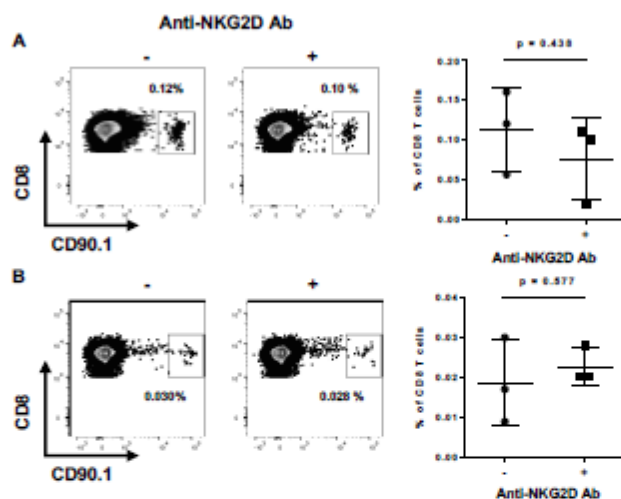

#### Additional File 3: The anti-NKG2D antibody clone HMG2D did not deplete NKG2D expressing cells.

Effector pMel CD8 T cells were generated as described in Fig. 1A. On day 6, half of the mice were injected with the anti-NKG2D antibody clone HMG2D. The percentage of pMel CD8 T cells among the total CD8 splenocytes was analyzed one (A) or eight (B) days later by flow cytometry. Data shown are representative of two independent experiments.
