# Supplementary material
Source: HighWire-hosted journal article supplement (https://jitc.bmj.com/content/7/1/48)
Supplement: media-6 [file media-6.pdf]

## Additional File 6

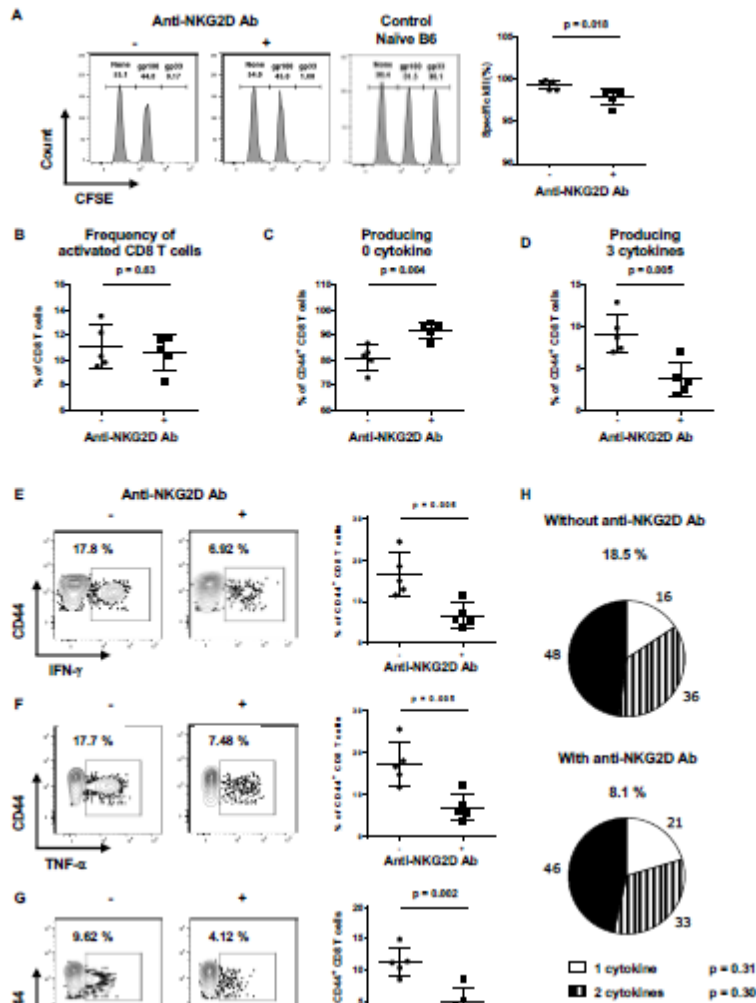

**Additional File 6: Endogenous effector CD8 T cells have a slightly decreased effector response in the absence of NKG2D signaling.** (A) Example of in vivo CTL assay readout by flow cytometry during effector responses. (B) Representative graph shows the percentages of endogenous antigen-experienced (CD44<sup>+</sup>) CD8 T cells among total CD8 T cells present in the spleen of immunized mice one day after target injection for in vivo CTL assay. (C-H) Splenocytes from (b) were restimulated overnight with gp33 peptide or irrelevant peptide (hgp100). Cytokine production was measured the next day by flow cytometry. The percentages of endogenous CD44<sup>+</sup> CD8 T cells that produce 0 (c) or 3 cytokines (D) are shown. (E-G) Shown are flow examples and graph summarizing the percentage of endogenous CD44<sup>+</sup> CD8 T cells secreting IFN- $\gamma$  (E), TNF- $\alpha$  (F) or IL-2 (G). (H) Pie charts show the percentage of endogenous CD44<sup>+</sup> CD8 T cells that produce 1, 2, or 3 cytokines among the cells that produce at least one cytokine (denoted above each pie chart). Data shown are representative of two independent experiments.
