# Supplementary material
Source: HighWire-hosted journal article supplement (https://jitc.bmj.com/content/7/1/48)
Supplement: media-8 [file media-8.pdf]

## Additional File 8

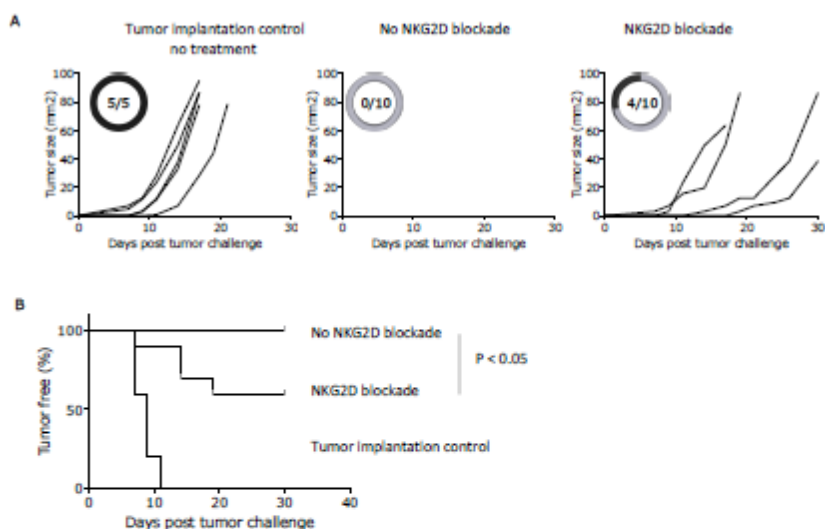

**Additional File 8: Memory cells formed upon transient NKG2D blockade were not protective against melanoma B16 tumor.** Memory pMel CD8 T cells were generated as in Fig 1A. (A-B) B16 melanoma cells were injected during memory phase (~d40). Tumor growth (A) and incidence (B) were followed over time. Lines in graphs shown in A represent the tumor growth of a single mouse. Tumor incidence in mice with memory pMel CD8 T cells formed in absence or presence of transient NKG2D blockade is indicated on each graph. Naive C57BL/6 mice were used as control. The graphs show the results of one of two experiments.
